# Supplementary material
Source: PubMed Central journal article supplement (PMC2976271)
Supplement: supp_76_21_7285__1.pdf [file supp_76_21_7285__1.pdf]

## Supplemental Material

**Table S1.** Relative gene expression of BB-12 genes whose expression was down-regulated according to cDNA microarrays, represented by fold-change values corresponding to mean of two analyses carried out using a dye-swap. Positive and negative values correspond to up- and down-regulation on XOS, respectively (with glucose as the reference).

| ID                   | Description                                          | Fold-change |
|----------------------|------------------------------------------------------|-------------|
| Up-regulated genes   |                                                      |             |
| BIF_00501            | Xylose isomerase                                     | 33          |
| BIF_00092            | $\beta$ -Xylosidase/ $\alpha$ -L-arabinofuranosidase | 31          |
| BIF_00212            | Sugar-binding protein                                | 29          |
| BIF_00257            | Transporter                                          | 25          |
| BIF_00258            | Transporter                                          | 18          |
| BIF_00405            | $\beta$ -Xylosidase/ $\alpha$ -L-arabinofuranosidase | 6.1         |
| BIF_00633            | Endo-1,4- $\beta$ -xylanase                          | 6.0         |
| BIF_01688            | Hypothetical protein                                 | 5.9         |
| BIF_00829            | Xylulose kinase                                      | 4.8         |
| BIF_01171            | Sialic acid-specific 9- <i>O</i> -acetylerase        | 3.7         |
| BIF_01350            | NrdI                                                 | 2.2         |
| BIF_00928            | Endo-1,4- $\beta$ -xylanase                          | 2.2         |
| BIF_01170            | <i>para</i> -Nitrobenzyl esterase                    | 2.1         |
| BIF_00432            | Transcriptional repressor                            | 2.1         |
| Down-regulated genes |                                                      |             |
| BIF_00155            | Formate acetyltransferase                            | -4.2        |
| BIF_01820            | Hypothetical protein                                 | -3.5        |
| BIF_02081            | (S,S)-butane-2,3-diol dehydrogenase                  | -3.0        |
| BIF_00800            | Glycerol-3-phosphate-binding protein                 | -3.0        |
| BIF_01895            | Inosine-uridine preferring nucleoside hydrolase      | -2.8        |
| BIF_00127            | LSU ribosomal protein L31P                           | -2.6        |
| BIF_00712            | Pyruvate formate-lyase activating enzyme             | -2.3        |
| BIF_02090            | Sucrose phosphorylase                                | -2.2        |
| BIF_00289            | Multidrug resistance protein B                       | -2.2        |
| BIF_00469            | Maltose/maltodextrin-binding protein                 | -2.1        |

**Figure S1.** Proteomic response of BB-12 to growth in a rich broth supplemented with glucose or XOS, represented by Cy3 (green) and Cy5 (red) coloured images, respectively, as well as an overlay of the two images. Spots of differentially-expressed proteins are designated in Fig. S2.

**Figure S2.** Image of a representative 2D-DIGE gel. Differentially-expressed protein spots, molecular weight and isoelectric point markers are denoted. The proteins identified from the spots are listed in Table S2.

**Table S2.** Proteins from BB-12 identified by MALDI-TOF MS and tandem MS from the differentially-expressed protein spots shown in Fig. S2.

| Spot No. | Fold Change       | Protein ID | Protein description                                  | Mascot PMF score <sup>b</sup>   | E value               | Sequence coverage (%) | No. peptides searched (matched) | Theor. (Obs. <sup>c</sup> ) MW (kDa) | Theor. (Obs.) pI | Peptides identified by tandem MS <sup>d</sup> | Mascot Tandem MS Ion score | E value               |
|----------|-------------------|------------|------------------------------------------------------|---------------------------------|-----------------------|-----------------------|---------------------------------|--------------------------------------|------------------|-----------------------------------------------|----------------------------|-----------------------|
| 1        | -1.8 <sup>a</sup> | 57         | Aconitate hydratase                                  | 80                              | 1.7×10 <sup>-05</sup> | 18                    | 94 (19)                         | 98.3 (110)                           | 4.8 (4.8)        | K.AVIVESFER.I                                 | 23                         | 2.9×10 <sup>-4</sup>  |
| 2        | -1.6              | 155        | Formate acetyltransferase                            | 50                              | 1.6×10 <sup>-2</sup>  | 11                    | 23 (7)                          | 92.0 (110)                           | 5.1 (4.9)        |                                               |                            |                       |
| 3        | -3.0              | 332        | Negative regulator of genetic competence clpC/mecB   | 141                             | 1.3×10 <sup>-11</sup> | 18                    | 27 (15)                         | 95.6 (100)                           | 5.3 (5.5)        |                                               |                            |                       |
| 4        | 1.8               | 1199       | Acetyl-/propionyl-coenzyme A carboxylase alpha chain | 109                             | 2.0×10 <sup>-8</sup>  | 28                    | 53 (16)                         | 68.3 (75)                            | 5.3 (5.6)        | K.HSYLVTDAQDIPR.V                             | 19                         | 1.7×10 <sup>-2</sup>  |
|          |                   | 863        | Acetolactate synthase large Subunit                  | 63                              | 9.1×10 <sup>-4</sup>  | 17                    | 53 (10)                         | 70.8 (75)                            | 5.3 (5.3)        |                                               |                            |                       |
| 5        | 1.8               | 405        | β-xylosidase                                         | 117                             | 3.2×10 <sup>-9</sup>  | 26                    | 74 (17)                         | 76.3 (70)                            | 5.6 (4.4)        | R.IDLDAADAAGVDPEIEAAR.T                       | 44                         | 5.0×10 <sup>-5</sup>  |
| 6        | 2.3               | 400        | 60 kDa chaperonin GROEL                              | 263                             | 8.1×10 <sup>-24</sup> | 62                    | 96 (32)                         | 56.5 (70)                            | 4.7 (4.7)        | K.IIEYDEEAR.Q                                 | 33                         | 9.3×10 <sup>-4</sup>  |
|          |                   |            |                                                      | R.FGLDLDFTEGMR.F                |                       |                       |                                 |                                      |                  | 30                                            | 4.6×10 <sup>-3</sup>       |                       |
|          |                   |            |                                                      | K.RTDDVAGDGTTTATVLAQSLVH EGLK.N |                       |                       |                                 |                                      |                  | 60                                            | 6.2×10 <sup>-8</sup>       |                       |
|          |                   |            |                                                      | K.IAEALDKVGDGVVTVEDNNR.F        |                       |                       |                                 |                                      |                  | 74                                            | 2.7×10 <sup>-8</sup>       |                       |
| 7        | 2.0               | 400        | 60 kDa chaperonin GROEL                              | 167                             | 3.2×10 <sup>-14</sup> | 39                    | 54 (17)                         | 56.5 (70)                            | 4.7 (4.7)        |                                               |                            |                       |
|          |                   | 1321       | Phosphoglucomutase                                   | 121                             | 1.3×10 <sup>-9</sup>  | 27                    | 54 (15)                         | 60.6 (70)                            | 4.9 (4.7)        |                                               |                            |                       |
| 8        | 1.8               | 177        | ftsZ                                                 | 87                              | 3.0×10 <sup>-6</sup>  | 41                    | 89 (13)                         | 43.5 (60)                            | 4.4 (4.2)        | R.LLELDDSSIGIVDAFR.T                          | 37                         | 3.7×10 <sup>-4</sup>  |
|          |                   |            |                                                      | K.LAQANEDAQAAASAPQR.T           |                       |                       |                                 |                                      |                  | 18                                            | 3.4×10 <sup>-2</sup>       |                       |
|          |                   |            |                                                      | K.LAEVNQAVGFVRE                 |                       |                       |                                 |                                      |                  | 18                                            | 2.7×10 <sup>-2</sup>       |                       |
|          |                   |            |                                                      | K.QFDNIIDLK.-                   |                       |                       |                                 |                                      |                  | 23                                            | 1.2×10 <sup>-2</sup>       |                       |
|          |                   | 1629       | ABC transporter ATP-binding protein                  | 29                              | 2.0×10 <sup>0</sup>   | 18                    | 88 (7)                          | 38.6 (60)                            | 4.3 (4.2)        | R.FGENTKADESTLADELDPVDAA R.L                  | 25                         | 4.2×10 <sup>-3</sup>  |
| 9        | 2.5               | 1979       | Galactokinase                                        | 186                             | 4.0×10 <sup>-9</sup>  | 43                    | 66 (16)                         | 44.9 (60)                            | 4.5 (4.3)        | R.APHQLNDGQYAQR.R                             | 48                         | 2.7×10 <sup>-5</sup>  |
|          |                   |            |                                                      | R.EVADLVNAQADPAAALDGVLD R.L     |                       |                       |                                 |                                      |                  | 25                                            | 4.0×10 <sup>-3</sup>       |                       |
|          |                   |            |                                                      | R.ILGVANLR.E                    |                       |                       |                                 |                                      |                  | 19                                            | 1.1×10 <sup>-2</sup>       |                       |
|          |                   |            |                                                      | R.TYIALSPR.D                    |                       |                       |                                 |                                      |                  | 18                                            | 2.7×10 <sup>-2</sup>       |                       |
|          |                   |            |                                                      | R.IAQAIKDEFER.R                 |                       |                       |                                 |                                      |                  | 27                                            | 2.8×10 <sup>-3</sup>       |                       |
|          |                   |            |                                                      |                                 |                       |                       |                                 |                                      |                  |                                               |                            |                       |
| 10       | 13                | 501        | Xylose isomerase                                     | 274                             | 6.4×10 <sup>-25</sup> | 53                    | 95 (33)                         | 52.8 (60)                            | 4.7 (4.7)        | K.AKEPTTHQYDFDAATACNFLR.A                     | 107                        | 2.9×10 <sup>-11</sup> |
|          |                   |            |                                                      | K.LNLEGNHANLAGHTYQHEIR.V        |                       |                       |                                 |                                      |                  | 117                                           | 3.0×10 <sup>-12</sup>      |                       |

|    |      |      |                                                 |     |                       |    |          |           |           |                              |     |                       |
|----|------|------|-------------------------------------------------|-----|-----------------------|----|----------|-----------|-----------|------------------------------|-----|-----------------------|
|    |      |      |                                                 |     |                       |    |          |           |           | K.LGAEYFCFHDRDIAPEGDTLR.E    | 29  | $1.2 \times 10^{-3}$  |
|    |      |      |                                                 |     |                       |    |          |           |           | K.EPTTHQYDFDAATACNFLR.A      | 104 | $4.4 \times 10^{-11}$ |
|    |      |      |                                                 |     |                       |    |          |           |           | R.TSFSaedLFR.A               | 73  | $1.0 \times 10^{-7}$  |
| 11 | 13   | 501  | Xylose isomerase                                | 309 | $2.0 \times 10^{-28}$ | 51 | 100 (32) | 52.8 (60) | 4.7 (4.7) | K.LNLEGNHANLAGHTYQHEIR.V     | 123 | $8.6 \times 10^{-13}$ |
|    |      |      |                                                 |     |                       |    |          |           |           | R.LGAENYVFWGGR.E             | 46  | $3.3 \times 10^{-5}$  |
|    |      |      |                                                 |     |                       |    |          |           |           | K.LGAEYFCFHDR.D              | 28  | $2.7 \times 10^{-2}$  |
|    |      |      |                                                 |     |                       |    |          |           |           | K.AKEPTTHQYDFDAATACNFLR.A    | 129 | $1.8 \times 10^{-13}$ |
|    |      |      |                                                 |     |                       |    |          |           |           | R.RTSFSaedLFR.A              | 55  | $6.2 \times 10^{-6}$  |
| 12 | 7.0  | 501  | Xylose isomerase                                | 261 | $1.3 \times 10^{-23}$ | 56 | 99 (34)  | 52.8 (60) | 4.7 (4.7) | K.LNLEGNHANLAGHTYQHEIR.V     | 109 | $2.0 \times 10^{-11}$ |
|    |      |      |                                                 |     |                       |    |          |           |           | K.AKEPTTHQYDFDAATACNFLR.A    | 48  | $2.2 \times 10^{-5}$  |
|    |      |      |                                                 |     |                       |    |          |           |           | K.EPTTHQYDFDAATACNFLR.A      | 23  | $5.2 \times 10^{-3}$  |
| 13 | 2.2  | 137  | Bacterial peptide chain release factor 2 (RF-2) | 190 | $1.6 \times 10^{-16}$ | 50 | 77 (20)  | 42.0 (60) | 4.7 (4.8) | R.ISPFDNQGR.R                | 37  | $3.1 \times 10^{-4}$  |
|    |      |      |                                                 |     |                       |    |          |           |           | M.AEFDYSQAISDAR.A            | 69  | $2.3 \times 10^{-7}$  |
|    |      |      |                                                 |     |                       |    |          |           |           | R.TGCETSQTQAVFDGDIDEFIQAGI   | 71  | $1.1 \times 10^{-7}$  |
|    |      |      |                                                 |     |                       |    |          |           |           | R.W                          |     |                       |
| 14 | 2.2  | 530  | Phosphoglucosamine mutase                       | 156 | $4.0 \times 10^{-13}$ | 50 | 94 (20)  | 48.2 (60) | 4.9 (4.9) | R.VLLRPSGTEPLVR.V            | 19  | $8.7 \times 10^{-3}$  |
|    |      |      |                                                 |     |                       |    |          |           |           | R.DLTAQLALDLGDAAVR.V         | 73  | $7.1 \times 10^{-8}$  |
|    |      |      |                                                 |     |                       |    |          |           |           | R.YVLEEMLR.G <sup>c</sup>    | 22  | $1.6 \times 10^{-2}$  |
|    |      |      |                                                 |     |                       |    |          |           |           | R.ASGADLGVAFDGDADR.C         | 26  | $4.9 \times 10^{-3}$  |
|    |      | 681  | Argininosuccinate synthase                      | 83  | $8.5 \times 10^{-6}$  | 38 | 94 (15)  | 45.9 (60) | 4.8 (4.9) |                              |     |                       |
| 15 | -8.8 | 1197 | Enolase                                         | 60  | $1.6 \times 10^{-3}$  | 27 | 67 (8)   | 46.5 (50) | 4.7 (4.2) |                              |     |                       |
| 16 | -3.7 | 277  | Phosphoglycerate kinase                         | 47  | $3.0 \times 10^{-2}$  | 32 | 81 (9)   | 42.1 (50) | 4.8 (4.3) | K.VVPELSLAPVAAR.L            | 19  | $1.2 \times 10^{-2}$  |
|    |      |      |                                                 |     |                       |    |          |           |           | K.DGDVVLLLENVR.F             | 32  | $1.4 \times 10^{-3}$  |
|    |      | 1197 | Enolase                                         | 47  | $3.3 \times 10^{-2}$  | 25 | 81 (10)  | 46.5 (50) | 4.7 (4.3) | R.LQFVGDDLFVTNPVR.L          | 40  | $1.8 \times 10^{-4}$  |
|    |      |      |                                                 |     |                       |    |          |           |           | R.GNPTVEVVLDTDDGAR.G         | 46  | $5.0 \times 10^{-5}$  |
|    |      |      |                                                 |     |                       |    |          |           |           | M.AAIESVYAR.Q                | 18  | $3.8 \times 10^{-2}$  |
|    |      | 1636 | Choline binding protein A                       | 46  | $4.0 \times 10^{-2}$  | 39 | 81 (7)   | 19.7 (50) | 9.3 (4.3) |                              |     |                       |
| 17 | 4.1  | 287  | Transaldolase                                   | 115 | $5.1 \times 10^{-9}$  | 28 | 68 (13)  | 39.9 (40) | 4.7 (4.5) |                              |     |                       |
|    |      | 212  | Sugar-binding protein                           | 73  | $8.9 \times 10^{-5}$  | 24 | 68 (12)  | 48.4 (40) | 4.8 (4.5) |                              |     |                       |
| 18 | 5.1  | 212  | Sugar-binding protein                           | 75  | $5.6 \times 10^{-5}$  | 29 | 52 (10)  | 48.4 (40) | 4.8 (4.6) | K.AFSTIPASEPAR.A             | 38  | $2.8 \times 10^{-4}$  |
| 19 | 4.1  | 287  | Transaldolase                                   | 169 | $2.0 \times 10^{-8}$  | 51 | 99 (21)  | 39.9 (40) | 4.7 (4.6) | K.SWDSVLTDVQSGIDR.V          | 31  | $1.6 \times 10^{-3}$  |
|    |      | 212  | Sugar-binding protein                           | 116 | $4.0 \times 10^{-5}$  | 42 | 99 (18)  | 48.4 (40) | 4.8 (4.6) | K.AFSTIPASEPAR.A             | 50  | $2.1 \times 10^{-5}$  |
| 20 | 2.0  | 665  | Hypothetical protein                            | 67  | $3.2 \times 10^{-4}$  | 18 | 35 (9)   | 48.0 (40) | 4.8 (4.8) | K.TSADFVQIAHALDR.A           | 33  | $7.9 \times 10^{-4}$  |
|    |      |      |                                                 |     |                       |    |          |           |           | K.SMTPAEELLIR.S <sup>c</sup> | 27  | $4.4 \times 10^{-3}$  |
|    |      |      |                                                 |     |                       |    |          |           |           | R.DFGIPIVNKR.I               | 38  | $3.0 \times 10^{-4}$  |
| 21 | -1.6 | 207  | Cholylglycine hydrolase                         | 140 | $1.6 \times 10^{-11}$ | 61 | 59 (14)  | 37.2 (35) | 4.7 (4.7) | R.AAYNNTHYPTQSGENANVNR.L     | 88  | $1.5 \times 10^{-9}$  |
|    |      |      |                                                 |     |                       |    |          |           |           | R.FDDGQNNMYFGR.N             | 45  | $2.7 \times 10^{-5}$  |

|    |      |      |                                     |     |                       |    |         |           |           |                                   |    |                      |
|----|------|------|-------------------------------------|-----|-----------------------|----|---------|-----------|-----------|-----------------------------------|----|----------------------|
|    |      |      |                                     |     |                       |    |         |           |           | K.NVTIVGKPINDR.F                  | 15 | 7.6×10 <sup>-4</sup> |
| 22 | -1.8 | 207  | Choloylglycine hydrolase            | 100 | 1.6×10 <sup>-7</sup>  | 49 | 60 (12) | 37.2 (35) | 4.7 (4.7) | R.FDDGQNNMYFGR.N                  | 45 | 5.1×10 <sup>-5</sup> |
|    |      |      |                                     |     |                       |    |         |           |           | K.NVTIVGKPINDR.F                  | 15 | 3.8×10 <sup>-2</sup> |
|    |      |      |                                     |     |                       |    |         |           |           | R.NLDWSEDYGEK.I                   | 49 | 2.2×10 <sup>-5</sup> |
| 23 | -2.3 | 207  | Choloylglycine hydrolase            | 99  | 2.1×10 <sup>-7</sup>  | 41 | 96 (12) | 37.2 (35) | 4.7 (4.8) | R.FDDGQNNMYFGR.N                  | 56 | 4.3×10 <sup>-6</sup> |
|    |      |      |                                     |     |                       |    |         |           |           | K.NVTIVGKPINDR.F                  | 42 | 9.2×10 <sup>-5</sup> |
| 24 | -2.3 | 1306 | Oxidoreductase                      | 117 | 3.2×10 <sup>-9</sup>  | 30 | 37 (12) | 37.5 (30) | 5.4 (5.7) | R.YNIFDR.T                        | 15 | 4.3×10 <sup>-2</sup> |
| 25 | -1.8 | 1306 | Oxidoreductase                      | 196 | 4.0×10 <sup>-17</sup> | 46 | 45 (16) | 37.5 (30) | 5.4 (5.9) | R.IGHDDRFLNK.S                    | 25 | 6.3×10 <sup>-3</sup> |
|    |      |      |                                     |     |                       |    |         |           |           | K.YLLSSLDQSLER.L                  | 26 | 5.0×10 <sup>-3</sup> |
| 26 | -1.6 | 2081 | (S,S)-Butane-2,3-diol dehydrogenase | 112 | 1.0×10 <sup>-5</sup>  | 35 | 66 (12) | 29.3 (20) | 5.0 (5.3) | R.CETPDDVAGVVSFLVSDNAR.Y          | 71 | 8.3×10 <sup>-8</sup> |
|    |      |      |                                     |     |                       |    |         |           |           | K.DGFDVAVADLEGQR.Q                | 81 | 2.1×10 <sup>-8</sup> |
|    |      |      |                                     |     |                       |    |         |           |           | R.VAIVTGAAR.G                     | 30 | 1.6×10 <sup>-3</sup> |
|    |      |      |                                     |     |                       |    |         |           |           | R.IEQEGRR.A                       | 20 | 4.2×10 <sup>-2</sup> |
|    |      |      |                                     |     |                       |    |         |           |           | K.DGFDVAVADLEGQRQEAETIH           | 53 | 6.5×10 <sup>-6</sup> |
|    |      |      |                                     |     |                       |    |         |           |           | R.I                               |    |                      |
|    |      |      |                                     |     |                       |    |         |           |           | R.YVTGQTVIVDGGMQYR.- <sup>e</sup> | 23 | 1.0×10 <sup>-2</sup> |
| 27 | 1.6  | 1681 | Sugar transport ATP-binding protein | 77  | 3.3×10 <sup>-5</sup>  | 22 | 51 (9)  | 41.4 (45) | 5.7 (5.8) | M.AEVIFDHVTR.I                    | 20 | 2.7×10 <sup>-2</sup> |
|    |      |      |                                     |     |                       |    |         |           |           | K.TTDTLMSDQNQLTIR.V               | 16 | 3.9×10 <sup>-2</sup> |
|    |      |      |                                     |     |                       |    |         |           |           | K.AAEILDLTEFLDRKPK.A              | 15 | 1.6×10 <sup>-2</sup> |
| 28 | 2.6  | 287  | Transaldolase                       | 162 | 1.0×10 <sup>-13</sup> | 57 | 92 (20) | 39.9 (40) | 4.7 (4.6) | K.SWDSVLTDVQSGIDRVNG.-            | 61 | 1.3×10 <sup>-6</sup> |
|    |      |      |                                     |     |                       |    |         |           |           | K.FAEDPRWAALAK.G                  | 17 | 4.6×10 <sup>-2</sup> |
|    |      | 212  | Sugar-binding protein               | 130 | 1.6×10 <sup>-10</sup> | 45 | 92 (12) | 48.4 (40) | 4.8 (4.5) | K.AFSTIPASEPAR.A                  | 61 | 1.5×10 <sup>-6</sup> |
|    |      |      |                                     |     |                       |    |         |           |           | R.QYWENLAK.S                      | 27 | 4.4×10 <sup>-3</sup> |

<sup>a</sup> Positive and negative values represent over- and under-expression in the XOS samples, respectively (with glucose as a reference).<sup>b</sup> Peptide mass fingerprinting (PMF) score obtained using the protein sequence database program Mascot with the genome sequence of BB-12 as taxonomy entry. Scores > 45 are significant.<sup>c</sup> Approximate values. <sup>d</sup> R. and K. denote cleavage at the C-terminal of an arginine and lysine residues, respectively. <sup>e</sup> Peptides oxidised at a methionine residue.
